# Supplementary material for: The Impact of Forest Fungi on Promoting Growth and Development of Brassica napus L.
Source: MDPI journal article supplement (doi:10.3390/agronomy11122475), 2021-12-06
Supplement: s1 [file s1]

## Supplemental data

**Table S1.** Access numbers, length and chromosomal location of the analyzed rapeseed MT promoter sequences obtained from the NCBI database.

| Sequences          | Access Number | Sequences lenght<br>[bp] | Chromosomal<br>localization |
|--------------------|---------------|--------------------------|-----------------------------|
| MT1                | JX035784.1    | 1345                     | C8                          |
| MT2-1              | LOC106432553  | 1498                     | No information              |
| MT2-2              | LOC106452737  | 1499                     | A5                          |
| MT2-3              | LOC106448886  | 783                      | A1                          |
| MT2-4              | LOC106448877  | 774                      | A1                          |
| MT2-5              | LOC106448867  | 889                      | A1                          |
| MT2-6              | LOC106439197  | 1136                     | A3                          |
| MT2-7              | LOC106438836  | 1378                     | A3                          |
| MT2-8              | LOC106433557  | 1266                     | No information              |
| MT2-9              | LOC106427915  | 714                      | No information              |
| MT2-10             | LOC106424043  | 1290                     | No information              |
| MT2-11             | LOC106386474  | 1497                     | C3                          |
| MT2-12             | LOC106372582  | 1374                     | A10                         |
| MT2-13 (pseudogen) | LOC106429058  | 942                      | A3                          |

|       |              |      |    |
|-------|--------------|------|----|
| MT3-1 | LOC106401680 | 1499 | C5 |
| MT3-2 | LOC106406652 | 1493 | C6 |
| MT3-3 | LOC106385799 | 1495 | C3 |
| MT-EC | LOC106388507 | 1496 | C3 |

**Table S2.** Selected cis-regulatory elements found in the rapeseed MT promoter sequences.

| Groupe                                | Motives   | Function                                                    | Consensus sequences                   | Occuurence                                                                                                      |
|---------------------------------------|-----------|-------------------------------------------------------------|---------------------------------------|-----------------------------------------------------------------------------------------------------------------|
| Motives related to the light response | I-box     | light response element<br>(Martínez-Hernández et al., 2002) | GATAAGATT,<br>TATTATCTAGA,<br>GATAAGR | MT2-1, MT2-2,<br>MT2-6, MT2-10,<br>MT2-11, MT3-3                                                                |
|                                       | BOX II    | light response element<br>(Block et al., 1990)              | TCCACGTGGC,<br>ACGTGGC                | MT2-13                                                                                                          |
|                                       | ACE       | light response element<br>(Block et al., 1990)              | ACGTGG(A/C)                           | MT2-5, MT3-3                                                                                                    |
|                                       | GT1-motif | light response element<br>(Green et al., 1988)              | GGTTAA                                | MT2-3, MT2-4,<br>MT2-6, MT2-11,<br>MT2-13, MT3-1,<br>MT3-3                                                      |
|                                       | G-box     | light response element<br>(Menkens et al., 1995)            | CACGTG                                | MT2-3, MT2-4,<br>MT2-5, MT2-6,<br>MT2-7, MT2-8,<br>MT2-9, MT2-11,<br>MT2-12, MT2-13,<br>MT3-2, MT3-3,<br>MT2-14 |

|                                        |                  |                                                                                                            |                            |                                   |
|----------------------------------------|------------------|------------------------------------------------------------------------------------------------------------|----------------------------|-----------------------------------|
| Motives related to the stress response | MNF1             | light response element<br>(Morishima A., 1998)                                                             | GTGCCC(A/T)(A/T), GTGCCCTT | MT2-1, MT2-10                     |
|                                        | MRE              | light response element<br>(Schulze-Lefert et al., 1989)                                                    | AACCTAA, AACCTAACCT        | MT2-13, MT3-2                     |
|                                        | Sp1              | light response element<br>(Hudson & Quail, 2003)                                                           | GGGCC                      | MT2-1, MT2-10                     |
|                                        | LTR              | element activated in cold conditions<br>(Dunn et al., 1998)                                                | CCGAAA                     | MT2-1, MT2-2, MT2-10, MT3-1, MT1, |
|                                        | W-box            | element involved in the response to fungal elicitors<br>(Rushton et al., 1996)                             | TTGACC                     | MT2-9, MT3-2,                     |
|                                        | AT-rich sequence | element involved in the response to fungal elicitors<br>(Matarasso et al., 2005)                           | TAAAATACT, TAAAATAT        | MT2-8, MT2-11, MT2-12             |
|                                        | MBS              | element involved in the regulation of drought-related genes<br>(Urao et al., 1993)                         | CNGTT(G/A), TAACTG, CAACTG | MT3-1, MT1, MT2-9, MT2-10, MT3-2, |
|                                        | TCA-element      | element associated with salicylic acid inducing the expression of many genes<br>(Goldsbrough et al., 1993) | CCATCTTTTT, TCATCTTCTT     | MT2-1, MT2-10                     |
|                                        | ERE              | element related to the ethylene response<br>(Itzhaki et al. 1994)                                          | A(T/A)TTCAAA               | MT3-1, MT1, MT2-6, MT3-2, MT3-3   |

|  |                 |                                                                     |                                                  |                                                                                                                       |
|--|-----------------|---------------------------------------------------------------------|--------------------------------------------------|-----------------------------------------------------------------------------------------------------------------------|
|  | ABRE            | element related to the ABA response<br>(Choi et al., 2000)          | (C/T)ACGTGGC,<br>ACGTG,<br>GCAACGTGTC,<br>CACGTG | MT1, MT2-3,<br>MT2-4, MT2-5,<br>MT2-6, MT2-7,<br>MT2-8, MT2-9,<br>MT2-12, MT2-13,<br>MT2-14, MT2-11                   |
|  | P-box           | element related to the gibberellins response<br>(Mena et al., 2002) | CCTTTT                                           | MT2-2, MT2-7,<br>MT2-8, MT3-3                                                                                         |
|  |                 |                                                                     |                                                  |                                                                                                                       |
|  | Circadian clock | element related to the circadian cycle<br>(Piechulla et al., 1998)  | CAANNNNATC                                       | MT2-1, MT2-2,<br>MT2-3, MT2-4,<br>MT2-5, MT2-7,<br>MT2-8, MT2-9,<br>MT2-10, MT2-12,<br>MT3-1, MT3-2,<br>MT3-3, MT2-14 |
